1 **Thermal stress induces positive phenotypic and molecular feedback loops in**  
2 **zebrafish embryos**

3

4 Lauric Feugere<sup>1</sup>, Victoria F. Scott<sup>1</sup>, Quentin Rodriguez-Barucg<sup>2</sup>, Pedro Beltran-Alvarez<sup>2</sup> & Katharina C.  
5 Wollenberg Valero<sup>1\*</sup>

6

7 <sup>1</sup>Department of Biological and Marine Sciences, University of Hull, Cottingham Road, Kingston upon Hull, HU6  
8 7RX, United Kingdom.

9 <sup>2</sup>Department of Biomedical Sciences, University of Hull, Cottingham Road, Kingston upon Hull, HU6 7RX,  
10 United Kingdom.

11

12 \*Corresponding author: [k.wollenberg-valero@hull.ac.uk](mailto:k.wollenberg-valero@hull.ac.uk), +44 (0)1482 465187

13 ORCID: [0000-0001-8858-1804](https://orcid.org/0000-0001-8858-1804)

## 14 **Abstract**

15 Aquatic organisms must cope with both rising and rapidly changing temperatures. These environmental changes  
16 can affect numerous traits, from molecular to ecological scales. Biotic stressors can induce the release of chemical  
17 cues which trigger behavioural responses in other individuals. In this study, we infer whether abiotic stressors,  
18 such as fluctuating temperature, may similarly propagate stress responses between individuals in fish not directly  
19 exposed to the stressor. To test this hypothesis, zebrafish (*Danio rerio*) embryos were exposed for 24 hours to  
20 fluctuating thermal stress, to medium in which another embryo was thermally stressed before (“stress medium”),  
21 and to a combination of these. Growth, behaviour, and expression of a panel of genes were used to characterise  
22 the thermal stress response and its propagation between embryos. Both high temperatures and stress medium  
23 significantly accelerated development and altered embryonic behaviour. Thermal stress significantly decreased  
24 the expression of the antioxidant gene SOD1, eight hours after the end of exposure. Of note, we found that the  
25 expression of sulfide:quinone oxidoreductase (SQOR), likewise a part of the antioxidant metabolism relevant in  
26 vertebrate stress response, and of interleukin-1 $\beta$  (IL-1 $\beta$ ), involved in the immune response, were significantly  
27 altered by stress medium. This study illustrates the existence of positive thermal stress feedback loops in zebrafish  
28 embryos that induce stress in conspecifics. This evidence that thermal stress due to fluctuating, high temperatures  
29 can be propagated may be relevant for species found in high densities, either in aquaculture or in the natural  
30 environment, in a context of global change.

31

32 **Keywords:** behaviour, chemical communication, climate warming, gene expression, feedback loop, thermal  
33 stress, zebrafish embryos

34

## 35 **Introduction**

36 Temperature is the abiotic ‘ecological master factor’ regulating the biology of ectotherms (Brett, 1971; López-  
37 Olmeda & Sánchez-Vázquez, 2011). Ectotherms face thermal cycles that shape their biological rhythms by  
38 modulating survival, growth, and by triggering irreversible changes on thermal tolerance ranges of adults (Colinet  
39 et al., 2015; Kingsolver et al., 2015; Lim et al., 2017; López-Olmeda & Sánchez-Vázquez, 2011; Schaefer & Ryan,  
40 2006). Those natural, regular thermal fluctuations experienced during early development are necessary to  
41 maximise fitness-relevant traits and thermal tolerance (Hall & Warner, 2020b; Kingsolver et al., 2015; Lim et al.,  
42 2017; Schaefer & Ryan, 2006). Besides higher average temperatures, global warming will be characterised by  
43 both greater thermal variability and more extreme thermal events of longer duration and magnitude (Pörtner et al.,  
44 2019; Vasseur et al., 2014). These altered thermal rhythms may pose higher risks to species than simply higher  
45 mean temperatures, due to the asymmetry of the thermal fitness curve (Colinet et al., 2015; Saxon et al., 2018;  
46 Vasseur et al., 2014). Here, we exposed zebrafish embryos to several peaks of higher temperatures that consisted  
47 in thirteen exposures to +5°C within 24 hours. Although this thermal regime departs from natural, environmental

48 relevant extreme heatwaves, it serves to model the effects of repeated thermal stress upon the stress response of  
49 zebrafish embryos.

50 Fish as ectothermic vertebrates are susceptible to changes in the thermal environment, particularly to higher  
51 temperatures close to their upper thermal limits (Araújo et al., 2013; I. J. Morgan et al., 2001; Paaijmans et al.,  
52 2013). Early developmental stages have narrower thermal ranges than adults (Skjærven et al., 2014). Temperature  
53 regimes during development have irreversible effects as they modulate subsequent stages, making early fish  
54 embryos vulnerable or “bottleneck” stages in the context of climate change (Pörtner & Peck, 2010; Scott &  
55 Johnston, 2012; Villamizar et al., 2012). Examples for persistent effects of temperature changes during  
56 development may involve alterations of swimming performance and cardiac anatomy (Dimitriadi et al., 2018),  
57 masculinisation (Ribas et al., 2017) and increased mortality (Hosseini et al., 2019), which can shape the future  
58 trajectory of populations. Altogether, this illustrates a rising concern about the response of fish to global change,  
59 particularly at early stages of development.

60 The zebrafish (*Danio rerio*) is now emerging as a model organism to study the effects of thermal stress, including  
61 at the molecular level (Brown et al., 2015; Clark et al., 2011; Long et al., 2012; Luu et al., 2020). Adult zebrafish  
62 are eurythermal, naturally tolerating a wide range of temperatures (16.5-38.6°C) with optimal temperature around  
63 27-28.5°C. They may face natural thermal variations of ~5°C daily, and from 6 to 38°C seasonally (Engeszer et  
64 al., 2007; López-Olmeda & Sánchez-Vázquez, 2011; Spence et al., 2008). However, early stages of zebrafish only  
65 tolerate minimum temperatures of 22-23°C and maximum temperatures of around 32°C to develop normally (Pype  
66 et al., 2015; Schirone & Gross, 1968; Schnurr et al., 2014). Warm-adapted species such as the zebrafish that are  
67 living near their upper thermal limit may be among the ‘losers’ of climate change (Somero, 2010). Of note, the  
68 thermal biology of zebrafish is conserved in laboratory populations, in spite of laboratory domestication, which  
69 makes them an adequate model organism to investigate the effects of climate change in the laboratory (Brown et  
70 al., 2015; R. Morgan et al., 2019).

71 Besides the above-mentioned effects on sex ratio, direct mortality and adult phenotype, responses to thermal stress  
72 at the early stages of development involve altered behaviour, developmental rate, and altered gene expression  
73 related to the physiological stress response. Behavioural thermoregulation is one major thermoregulatory process  
74 in ectotherms (López-Olmeda & Sánchez-Vázquez, 2011). This is evident from a tightly controlled thermotaxis  
75 response in response to heat in zebrafish larvae (Haesemeyer et al., 2015, 2018). Heat stressed zebrafish larvae  
76 display more anxiety-like behaviours (Bai et al., 2016) and transient hyperactivity (Yokogawa et al., 2014). High  
77 temperatures also accelerate the embryonic development in zebrafish embryos as shown by the 2.8-fold increase  
78 in somitogenesis frequency across a 20-30°C range or the twice faster development at 33°C compared to 26°C  
79 (Hallare et al., 2005; Long et al., 2012; Schröter et al., 2008). Repeated exposure to sublethal temperatures,  
80 however, may depress development (Hall & Warner, 2020a). At the molecular level, heat stress leads to numerous  
81 molecular effects from the accumulation of reactive oxygen species (ROS) (Madeira et al., 2016; Vinagre et al.,  
82 2012) to changes in global gene expression patterns (Logan & Buckley, 2015; Long et al., 2012; Ribas et al., 2017)  
83 along the hypothalamic-pituitary-interrenal (HPI) axis (Alsop & Vijayan, 2009). For example, Cu/Zn-superoxide

84 dismutase I (SOD1) neutralises oxygen radicals to protect cells from oxidative stress (Cheng et al., 2018; Wang et  
85 al., 2016), and is heat inducible in zebrafish embryos (Icoglu Aksakal & Ciltas, 2018). Another less well studied  
86 enzyme, sulfide:quinone oxidoreductase (SQOR) is upregulated by heat stress in half-smooth tongue sole  
87 (*Cynoglossus semilaevis*) (Guo et al., 2016) and by hypoxia in Nile tilapia (*Oreochromis niloticus*) (J. H. Xia et  
88 al., 2018). SQOR expression is co-induced by both cold stress and hypoxia in zebrafish embryos (Long et al.,  
89 2012, 2015). The innate immune system is challenged by both high temperature and thermal fluctuations in teleost  
90 early stages (Mariana & Badr, 2019; Zhang et al., 2018). For instance, interleukin-1 $\beta$  (IL-1 $\beta$ ) is upregulated in  
91 zebrafish raised at high temperature but experiencing an immune challenge at low temperature (Zhang et al., 2018)  
92 and in zebrafish embryos exposed to high temperature (Icoglu Aksakal & Ciltas, 2018). This gene plays a central  
93 role in the stress response, having neuromodulatory and behavioural functions (Goshen & Yirmiya, 2009; Metz et  
94 al., 2006; Vitkovic et al., 2000).

95 Largely overlooked to date, however, is the question of whether the response to thermal stress can be transmitted  
96 to other individuals. Fish use chemical communication to alert others of a threat using so-called ‘alarm cues’  
97 (released after skin damage) or ‘disturbance cues’ (released without injury following a biotic stressor) (Jordão &  
98 Volpato, 2000). Exposure to conspecific predation-related disturbance cues induces stress-like responses in several  
99 fish species (Barcellos et al., 2011, 2014; Bett et al., 2016; Ferrari et al., 2008; Jordão & Volpato, 2000; Toa et al.,  
100 2004), including zebrafish (Barcellos et al., 2014). Importantly, even fish early stages are capable of such chemical  
101 communication as they respond to alarm cues (Atherton & McCormick, 2015, 2017; Oulton et al., 2013; Poisson  
102 et al., 2017). Despite the wealth of information on biotic stress-induced stress propagation, this phenomenon is  
103 only known from a few abiotic stressors, such as low pH, acute fasting or handling (Abreu et al., 2016; Feugere et  
104 al., in review), but in response to heat is only known from crayfish (Hazlett, 1985). Stress induces the release of  
105 metabolites into the environment, including hormones of the HPI axis (Barcellos et al., 2014; McGlashan et al.,  
106 2012), CO<sub>2</sub> (McGlashan et al., 2012), respiratory byproducts, catecholamines, or nitrogenous metabolic products  
107 such as urea (Bairos-Novak et al., 2017; Giaquinto & Hoffmann, 2012; Henderson et al., 2017; Hubbard et al.,  
108 2003), but less is known about their effects on communication. Distinct from alarm and disturbance cues, we  
109 introduced the term ‘stress metabolite’ referring to such cues induced without injury as a byproduct of the response  
110 to abiotic stress (Feugere et al., in review).

111 In this contribution we infer whether thermal stress can be propagated to naive receivers. To test this hypothesis,  
112 zebrafish embryos were exposed to independent and combined treatments of thermal stress and medium putatively  
113 containing stress metabolites induced by this thermal stress. Zebrafish embryo behaviour, growth rate, and  
114 expression of genes involved in the immune response (IL-1 $\beta$ ) and antioxidant pathways (SOD1, SQOR) were  
115 investigated. We expected that (i) fluctuating high temperatures, similar to constant higher temperatures, trigger  
116 developmental, behavioural and molecular stress responses in zebrafish embryos. Second (ii), we hypothesised  
117 that these responses could induce a positive feedback loop in naive receiver embryos, which are however (iii) not  
118 elicited by non-stress metabolites. It should be emphasised that our work primarily aimed to investigate the

119 existence of stress propagation induced by repeated thermal stress, in a context of growing concern for a future  
120 more stressful environment, rather than study the effects of realistic heatwaves.

121

## 122 **Materials and Methods**

### 123 **Experimental design**

124 For detailed zebrafish husbandry and breeding methods, see Supplementary Information. Just before the beginning  
125 of experimental treatments, several zebrafish embryos per clutch were photographed to estimate the median initial  
126 stage. Exposure began around the blastula stage (median stage: 2.75 hpf, at 512-cells). Fertilised healthy embryos  
127 (with chorion) were selected and individually placed into 0.2 mL 8-strip PCR tubes prefilled with 200  $\mu$ L of 1X  
128 E3 medium.

129 In a two-factorial design, embryos were exposed to different combinations of the two factors, temperature stress  
130 and temperature-induced stress medium. For this purpose, embryos were exposed to either thermal stress or control  
131 temperature protocols within a thermocycler, in either fresh medium or medium where embryos had previously  
132 been exposed to thermal stress and containing putative stress metabolites. All experimental treatments are detailed  
133 in Figure 1 and Table S1. The thermal stress protocol spanned 16.25 hrs, divided into thirteen 75-min series of  
134 temperature fluctuations between 27, 29, 32, 29, and 27°C, with each temperature step being maintained for 15  
135 min. Thermal stress mimicked +5°C temperature peaks over zebrafish optimal temperature (a total of n = 13 peaks)  
136 reaching the sublethal temperature of 32°C (Scott & Johnston, 2012). A recovery time of 7.75 hrs at 27°C followed  
137 the fluctuating temperatures period to reach a total incubation time of 24 hrs. The control thermal protocol was a  
138 steady 27°C for 24 hrs. E3 media following control or thermal stress conditions were reused for ‘control medium’  
139 and ‘stress medium’ treatments, respectively. In total this yielded five treatments: control (C, control protocol with  
140 fresh medium), control medium (CM, control protocol with reused medium from C), thermal stress (TS, thermal  
141 stress protocol with fresh medium), stress medium (SM, control protocol with reused medium from TS), and  
142 thermal stress + stress medium (TS+SM, thermal stress protocol with reused medium from TS). Used media were  
143 immediately re-used for treatments containing putative stress or control metabolites, respectively. As development  
144 in zebrafish accelerates with higher temperature (Kimmel et al., 1995) but decelerates with darkness (Bucking et  
145 al., 2013; Villamizar et al., 2014), additional control embryos were monitored after longer incubation times: 31  
146 hrs (C31), 37 hrs (C37), and 46 hrs (C46). These times were adjusted for darkness-raised embryos to reach the  
147 stages of prim-6 (25 hpf), prim-16 (31 hpf), and late pharyngula (35 - 42 hpf), respectively. Initial, final, and total  
148 exposure times were used to standardise each procedure. After incubation, transparent embryos were deemed alive  
149 and kept for subsequent steps. Before and after each exposure, embryo media were sampled to measure pH and  
150 O<sub>2</sub> saturation levels that could impact embryos in the used media. Oxygen levels were averaged from 1-2 min  
151 measurements using a glass vial equipped with an oxygen sensor spot (OXSP5, sensor code: SC7-538-193,  
152 Pyroscience GmbH) and connected to the FireSting O<sub>2</sub> Fiber Optic Oxygen Meter (FSO2-4, Pyroscience GmbH)  
153 and Oxygen Logger software (Pyroscience GmbH). Constant medium pHs were verified using the Fisherbrand™  
154 accumet™ AB150 pH Benchtop Meters.

155

## 156 **Analysis of phenotypic data**

157 Phenotypic analyses were conducted for all eight treatments. Embryos were placed in a watch glass vial and  
158 videoed by small batches using the camera setup (see Supplementary Information) over 15-30 seconds. Embryos  
159 were placed under light (similar intensity across measurements) to elicit a startle-like response after exposure in  
160 darkness. Behavioural data was analysed using Danioscope (Noldus). When possible, several videos were recorded  
161 for each embryo clutch and behavioural measurements were averaged for each individual embryo. Analysis of  
162 behavioural responses were conducted on the video-length standardised burst activity percentage (percentage of  
163 the time – from the total measurement duration – the embryo was moving). Final embryonic stages were estimated  
164 following Kimmel et al. (1995) from several photographs of embryos within their chorions using the criteria somite  
165 number, yolk extension to yolk ball ratio, presence and morphology of otoliths, tail aspect, presence of lens  
166 primordium, presence and position of the cerebellum relatively to the eyes, and pigmentation. The growth index  
167 was calculated as in equation 1.

$$168 \frac{\Delta hpf}{hr} = \frac{(embryo\ final\ stage\ (hpf) - batch\ median\ initial\ stage\ (hpf))}{batch\ exposure\ time\ (hr)} \quad (\text{equation 1})$$

169 Statistical analyses were conducted in RStudio (RStudio Team, 2020). Outliers among behavioural values were  
170 excluded from statistical analyses using Tukey's method with a 1.5 interquartile range cut-off. First, the effects of  
171 stress medium and thermal stress predictors across the C, TS, SM, and TS+SM treatments were evaluated. Shapiro-  
172 Wilk and Levene's tests were used to evaluate normality and homogeneity of variances, respectively.  
173 Normalisation methods were compared using the *BestNormalize* R package (Peterson & Cavanaugh, 2020). The  
174 growth index was parameterised using an order normalising transformation (Shapiro-Wilk's  $P = 0.98$ , Levene's  $P$   
175  $= 0.27$ ) and analysed by a two-way ANOVA with thermal stress and stress medium as predictors, followed by  
176 *post-hoc* pairwise Student's t-tests between control C and each experimental condition. The burst activity  
177 percentage and final stage (in hpf) could not be normalized and were analysed for the effects of both predictors  
178 using nonparametric Scheirer-Ray-Hare tests from the *rcompanion* R package (Mangiafico, 2018), followed by  
179 pairwise *post-hoc* Wilcoxon-Mann-Whitney tests. The final embryonic developmental period was coded as  
180 *segmentation* or *pharyngula* and analysed for the effects of thermal stress, stress medium as factors and initial  
181 stages as covariate using a generalised logistic model followed by pairwise *post-hoc* comparisons using the  
182 *emmeans* R package (Lenth, 2019).

183 Additional pairwise comparisons were performed of all response variables of CM against C and SM. To determine  
184 whether behavioural effects of treatment were related to developmental acceleration, pairwise comparisons of  
185 behaviour of control embryos (C) were compared to that of older control embryos (C31, C37, C46) using Kruskal-  
186 Wallis tests. Fourth, burst activity percentages of embryos from stress medium and thermal stress treatments were  
187 compared against that of control embryos incubated for longer times using pairwise Wilcoxon-Mann-Whitney  
188 tests. Multiple comparisons were corrected using Bonferroni adjustments. Cohen's  $|d|$  were obtained from the  
189 distribution used to compute the statistical analyses and calculated using the *effsize* r package (Torchiano, 2016)



190 or according to Lenhard & Lenhard (2016), respectively. Effect size was qualified based on thresholds given in  
191 Sawilowsky (2009): very small:  $|d| > 0.01$ , small:  $|d| > 0.2$ , medium:  $|d| > 0.5$ , large:  $|d| > 0.8$ , very large:  $|d| > 1.20$ ,  
192 huge:  $|d| > 2.0$ .

193

## 194 **Gene expression**

195 Gene expression analyses were conducted for CM, C, SM, TS, and TS+SM treatments (n = 3 pooled biological  
196 replicates of 60 embryos per treatment). Embryos were snap-frozen at  $-80^{\circ}\text{C}$  immediately after experimental  
197 treatments. Total RNA was extracted using a High Pure RNA isolation kit (Sigma-Aldrich) following the  
198 manufacturer's recommendations. cDNA was synthesized using Superscript II<sup>TM</sup> Reverse Transcriptase  
199 (Invitrogen, Life Technologies Ltd.) with sample randomisation. TaqMan<sup>®</sup> Gene Expression Assays  
200 (ThermoFisher Scientific) and 2X qPCR Bio Probe Hi-ROX (PCRBiosystems) were used to quantify the  
201 expression of three genes of interest (SQOR, SOD1, and IL-1 $\beta$ ) normalised to two reference genes (ef1- $\alpha$ ,  $\beta$ -actin).  
202 The effects of stress medium and thermal stress on the  $\text{Log}_2 2^{-\Delta\Delta\text{CT}}$  ( $\text{Log}_2$  fold-change) values were investigated  
203 using the *eBayes* and *lmFit* functions within the *limma* package (Ritchie et al., 2015) within the *Bioconductor*  
204 *v.3.11* (Ihaka & Gentleman, 1996) R environment. Next, pairwise *post-hoc* comparisons on C *versus* SM, TS, or  
205 TS+SM, and CM *versus* C or CM were performed using pairwise moderated t-tests with Bonferroni adjustments.  
206 Effect sizes (Cohen's  $|d|$ ) were calculated as above. More details on the gene expression analysis are given as  
207 Supplementary Information.

208

## 209 **Results**

### 210 **Phenotypic effects of thermal stress and its propagation**

211 First, the phenotypic effects of fluctuating thermal stress and of stress medium treatments were analysed.  
212 Embryonic growth indices were significantly accelerated by stress medium (small effect size,  $F = 6.291$ ,  $P =$   
213  $0.0128$ ), thermal stress (large effect size,  $F = 75.502$ ,  $P < 0.0001$ ), and their combination (very large effect size,  $F$   
214  $= 7.498$ ,  $P = 0.0067$ , Figure 2a, Table 1). *Post-hoc* tests revealed that TS ( $t = -7.9874$ ,  $P < 0.0001$ ), SM ( $t = -$   
215  $3.6784$ ,  $P = 0.0012$ ), and the combined treatment TS+SM ( $t = -7.2413$ ,  $P < 0.0001$ ) all accelerated growth,  
216 compared to the control C (Table S2). The growth acceleration was accompanied by a median advancement in  
217 embryonic stages of 3 to 9 hours, resulting in a switch from the segmentation to the pharyngula stage, compared  
218 to controls C and CM (see Supplementary Information, Figure S1a-b, Tables S3-S4). Treatments had no obvious  
219 effect on mortality.

220 We reasoned that any observed effects of stress medium may be due to regularly excreted metabolites, which  
221 accumulate towards the end of each treatment independently of thermal stress and would be up-concentrated in  
222 SM and TS+SM treatments. This warranted the use of an additional control, the 'control medium' (CM), that is,  
223 medium that had previously hosted control embryos. This control helped us exclude oxygen saturation and pH as  
224 confounding effects, which were also independently measured at the beginning of treatments and in all cases fell  
225 within zebrafish natural tolerance ranges (Strecker et al., 2011; Zahangir et al., 2015). We therefore assessed

226 whether stress medium, that is, medium where embryos had been exposed to thermal stress, evoked different  
227 effects compared to control medium. Embryonic growth in CM was compared to growth in C and SM. Embryos  
228 in CM grew slightly slower than control embryos ( $t = 2.3472$ ,  $P = 0.0418$ ) and much slower than embryos in SM  
229 ( $t = -6.7215$ ,  $P < 0.0001$ , Figure 2a, Table S2).

230 Next, we investigated the behavioural startle-like response to light (Figure 2b). Burst activity percentages were  
231 significantly lowered by both predictors stress medium ( $H = 9.3222$ ,  $P = 0.0023$ ) and thermal stress ( $H = 17.008$ ,  
232  $P < 0.0001$ ), whereas the interaction term was not significant ( $H = 1.8193$ ,  $P = 0.1774$ , Table 2). *Post-hoc*  
233 comparisons showed that embryos treated with SM ( $W = 1,387$ ,  $P = 0.0018$ ), TS ( $W = 3,548$ ,  $P = 0.0003$ ), and  
234 TS+SM ( $W = 2,455$ ,  $P < 0.0001$ ) all displayed lower burst percentages compared to control C. Embryos exposed  
235 to CM showed even stronger decline in burst activity percentages compared to C ( $W = 3,287$ ,  $P < 0.0001$ ) and SM  
236 ( $W = 1,745$ ,  $P < 0.0001$ , Table S5).

237 Considering the aforementioned thermal stress-induced growth acceleration, stage-dependent effects of behaviour  
238 were investigated in control embryos incubated for 24, 31, 37, or 46 hrs. We observed that burst activity  
239 percentages significantly decreased with development in pre-hatching control embryos raised for 31, 37, and 46  
240 hrs compared to those incubated for 24 hrs ( $P < 0.0001$ , Figure S2c, Table S6). However, neither final stages ( $P =$   
241  $0.1627$ ) nor growth index ( $P = 0.5027$ ) were correlated with burst activity percentages across treated embryos  
242 (Table S5). Moreover, pairwise tests showed that stressed embryos under development accelerated by TS, SM,  
243 and TS+SM treatments were significantly more active than control embryos reaching the same median stage of  
244 prim-6 in C31 ( $P < 0.0001$ , Figure 2b, Table S7).

245

#### 246 **Effects of thermal stress and its propagation on stress response-related gene expression**

247 The whole-embryo expression of three stress-inducible candidate genes (IL-1 $\beta$ , SOD1 and SQOR) was analysed  
248 (Figure 3, Tables 3 and S8). Thermal stress was not a significant predictor for the expression of either IL-1 $\beta$  or  
249 SQOR, but SOD1 expression was lower in the TS treatment compared to the control C (very large effect size but  
250 marginal significance,  $t = 2.76$ ,  $P = 0.045$ ). In contrast, stress medium significantly reduced IL-1 $\beta$  expression (very  
251 large effect size,  $t = 2.28$ ,  $P = 0.038$ ) and increased SQOR expression levels (huge effect size,  $t = -3.54$ ,  $P = 0.003$ ),  
252 but had no effects on SOD1 expression.

253 Pairwise tests revealed that SOD1 gene expression in control medium (CM) was much lower compared to C (huge  
254 effect size,  $t = -3.78$ ,  $P = 0.003$ ), but did not differ from C for the expression of SQOR and IL-1 $\beta$ . Second, pairwise  
255 tests showed that stress medium treatment (SM) triggered different gene expression responses compared to CM in  
256 all three studied markers. SM significantly reduced the expression of IL-1 $\beta$  (very large effect size,  $t = 2.62$ ,  $P =$   
257  $0.034$ ) and increased that of SOD1 (very large effect size,  $t = -2.64$ ,  $P = 0.034$ ), whereas there was a only a non-  
258 significant trend towards increased SQOR expression ( $P = 0.08$ ). Relative to the control, the gene expressions of  
259 IL1- $\beta$  and SQOR in SM showed opposite patterns compared to CM. Taken together, our gene expression results  
260 suggest that incubation in stress medium leads to reduced IL-1 $\beta$  expression and increased SQOR expression.

261



## 262 **Discussion**

### 263 **Fluctuating high temperatures induce a stress response in zebrafish embryos**

264 Communication between conspecifics can potentiate the response of a group to stressors (Giacomini et al., 2015),  
265 consequently the combined effects of abiotic stressors and any feedback loops they induce are of great importance  
266 in the context of global change. For instance, by the end of the century not only temperature but also chemical  
267 cues associated with a warming aquatic environment could be altered (Chivers et al., 2013; Lienart et al., 2016;  
268 Roggatz et al., 2019), and warming is known to affect predator-prey communication via infochemicals (J. Xia et  
269 al., 2020). The overarching aim of this work was to investigate whether zebrafish embryos can propagate aspects  
270 of their response to fluctuating heat stress to naive receiver embryos through positive feedback loops.

271 First, we investigated the effects of fluctuating thermal stress on zebrafish embryos. Our results showed that heat  
272 stressed embryos grew faster than control embryos, which is consistent with previous reports (Long et al., 2012;  
273 Schnurr et al., 2014). This may in turn favour premature hatching of smaller larvae (Cingi et al., 2010; Schmidt &  
274 Starck, 2010). Stressed embryos were less active than control embryos incubated for 24 hours but were hyperactive  
275 compared to controls developed to the same stage of prim-6 without stress treatments. Our results support previous  
276 observations that heat stress triggers higher behavioural activity in zebrafish early stages (Gau et al., 2013;  
277 Yokogawa et al., 2014). Such behavioural alterations may be explained by (i) energy trade-offs between behaviour,  
278 growth, and the metabolic costs of stress response (Barton & Iwama, 1991; Simčič et al., 2015), as well as (ii)  
279 temperature-dependent molecular changes in gene expression, epigenetic gene regulation, or post-translational  
280 modification related to behaviour, potentially involving circadian clock and neurodevelopmental genes (Colson et  
281 al., 2019; López-Olmeda & Sánchez-Vázquez, 2011).

282 At the gene expression level, we found that IL-1 $\beta$  and SQOR remained unchanged in thermally-stressed embryos.  
283 This contrasts with previous findings of SQOR upregulation in response to thermal and hypoxic stresses (Guo et  
284 al., 2016; Long et al., 2012, 2015; J. H. Xia et al., 2018) and of heat-induced increased IL-1 $\beta$  levels in adult black  
285 rockfish (*Sebastes schlegelii*) (Lyu et al., 2018) and zebrafish embryos (Icoglu Aksakal & Ciltas, 2018). Higher  
286 temperature stress usually triggers an upregulation of SOD1 (Liu et al., 2018; Mahanty et al., 2016). In contrast,  
287 fluctuating thermal stress in this study reduced SOD1 expression compared to the control, measured almost eight  
288 hours after the cessation of thermal fluctuations. These inverted gene expression patterns under fluctuating, as  
289 compared to constant thermal stress, might be related to energetic depletion as a result of the thermal cycles  
290 (Schaefer & Ryan, 2006). Repetition of heat stress also downregulated heat shock proteins in lake whitefish  
291 (*Coregonus clupeaformis*) embryos (Whitehouse et al., 2017). Nevertheless, it should be acknowledged that the  
292 differences in developmental rate observed under fluctuating heat stress may superimpose confounding effects to  
293 the effects of the heat stimulus, as gene expression varies with ontogeny during zebrafish embryogenesis  
294 (Mathavan et al., 2005). Nonetheless, it is likely that fluctuating temperatures experienced through early  
295 development of zebrafish embryos cause lasting developmental and behavioural changes, similar to those already  
296 shown to occur in vertebrate ectotherms after static increased temperatures.

297

298 **Thermal stress induces positive stress feedback loops in naive receiver embryos**

299 It is well-known that animals can chemically communicate a state of distress to others, although predation stress  
300 has traditionally received the most attention (Barcellos et al., 2014; Jordão & Volpato, 2000). Here, we found that  
301 fluctuating thermal stress negatively affects naive conspecifics, with a similar directionality of effects than the  
302 thermal stress itself, which can be described as a positive feedback loop.

303 First, embryos in our experiment grew faster when subjected to stress medium obtained from previously heat-  
304 stressed embryos, reaching similar stages to those of heat-stressed embryos. Such “catch-up” synchronous growth  
305 has been shown in egg-clustered embryos of several species and indicates the presence of embryo-embryo  
306 communication. Usually this communication serves to maximise energy costs against potential threats and to  
307 potentially facilitate group emergence (Aubret et al., 2016; Colbert et al., 2010; McGlashan et al., 2012).

308 Second, stress medium triggered behavioural hyperactivity compared to control embryos reaching an equivalent  
309 stage (prim-6). These results are in agreement with higher activities in rainbow trout embryos facing alarm cues  
310 (Poisson et al., 2017) but depart from lower behaviour activities in 24 hpf zebrafish embryos exposed to  
311 conspecific alarm cues (Lucon-Xiccato et al., 2020), which suggest that the response depends on the type of the  
312 cue and the tested model. In our experiment, these behavioural responses were measured, for the first time, as a  
313 response to temperature stress-elicited cues. Behavioural alteration was also observed in adult zebrafish in  
314 response to low pH and fasting stress-induced metabolites (Abreu et al., 2016), and adult marine invertebrates  
315 experiencing metabolites from low pH-stressed conspecifics and heterospecifics (Feugere et al, in review).

316 Third, stress medium originating from thermally-stressed embryos induced changes in gene expression patterns in  
317 naive conspecific receiver embryos. IL-1 $\beta$  was significantly downregulated in stress medium treatments. The stress  
318 medium-mediated inhibition of IL-1 $\beta$  in our experiment suggests that one of its inhibitor stress hormones, such as  
319 cortisol, adrenaline and the adrenocorticotrophic hormone (Castillo et al., 2009; Castro et al., 2011), or HSF1 (Cahill  
320 et al., 1996) could be upregulated by stress media. Intriguingly, the expression of immune genes may be associated  
321 with behavioural changes in zebrafish, since highly responsive fish also have higher IL-1 $\beta$  expression (Kirsten et  
322 al., 2018). This indicates a functional link between the concomitant decreases of IL-1 $\beta$  and lower activity of stress  
323 medium-treated embryos compared to 24 hrs-incubated medium control embryos.

324 On the other hand, SQOR expression was significantly upregulated by stress medium. SQOR has been little studied  
325 in an environmental stress response context thus far, but emerged as a novel candidate marker from recent  
326 transcriptomics studies of thermal and oxidative stress (Guo et al., 2016; Long et al., 2012, 2015; Wollenberg  
327 Valero et al., 2019; J. H. Xia et al., 2018). SQOR is involved in the metabolism of hydrogen sulfide (H<sub>2</sub>S),  
328 concentrations of which are toxic at supraphysiological levels, by tuning its neuromodulatory and biological roles  
329 (Augustyn et al., 2017; Chao et al., 2012; Horsman & Miller, 2016; Jackson et al., 2012; Rose et al., 2017).  
330 Interestingly, SQOR and H<sub>2</sub>S may be involved in the response to oxidative stress through increasing glutathione  
331 levels (Kimura et al., 2010; Yonezawa et al., 2007) and by mediating the antioxidant effects of CoQ10 (Kleiner et  
332 al., 2018). There is evidence that SQOR maintains ATP production (Quinzii et al., 2017) and has been proposed  
333 as a growth-related candidate gene (Zhuang et al., 2020). Kleiner and colleagues (Kleiner et al., 2018) found that

334 an increase of SQOR may prevent oxidative stress by facilitating the antioxidant effects of CoQ10. Reversely, a  
335 downregulation of SQOR may reflect deficiency of its coenzyme CoQ10, which in turn alters the sulfide  
336 metabolism leading to accumulated H<sub>2</sub>S levels and depletion of glutathione, that may cause oxidative damages  
337 (Luna-Sánchez et al., 2017; Quinzii et al., 2017; Ziosi et al., 2017). Therefore, the upregulation of SQOR under  
338 stress medium treatment could have multiple functions, from metabolising toxic levels of H<sub>2</sub>S to restoring both  
339 ATP and GSH levels in response to stress communication from a conspecific. Altogether, our results indicate  
340 impaired immune and antioxidant responses in embryos exposed to propagated thermal stress.

341

#### 342 **Stress medium and control medium do not induce similar feedback mechanisms**

343 Embryos exposed to the control medium developed slower than control embryos from E3 medium, showing  
344 opposite directionality to all other treatments. This opposite directionality was mirrored by the expression patterns  
345 of the three investigated genes. The behavioural response to stress medium was also significantly less pronounced  
346 than that to control medium, corroborating previous studies where metabolites from undisturbed versus stressed  
347 donors induced different responses in several species (Bairos-Novak et al., 2017; Bett et al., 2016). However,  
348 activity was much higher in control embryos from E3 medium than in embryos incubated in control medium. This  
349 finding may indicate that behavioural activity of zebrafish embryos is tightly controlled by the nature of their  
350 chemical environment (vs. relaxed in the absence of any cues), lending additional support to chemical  
351 communication as a global change-relevant parameter.

352 Lastly, the similarity in development and behavioural values in combined thermal stress plus stress medium  
353 treatments together with a larger effect size indicate that thermal stress and stress medium may excite similar  
354 molecular pathways regulating growth rate and behavioural activity, but that these pathways are saturated by single  
355 stressors, and cannot be further altered in the combined treatment. Conversely, our gene expression analysis  
356 revealed a difference in molecular responses between the two independent factors, thermal stress and stress  
357 medium. To better understand these contrasting synergistic vs. independent effects of thermal stress and stress  
358 medium, gene expression could be compared at global scale in future work.

359

#### 360 **Conclusion**

361 To conclude, our study indicates that thermally-stressed zebrafish embryos induce a stress response in naive  
362 conspecifics that have not been exposed to thermal stress, from molecular to phenotypic level. This extends the  
363 concept of stress feedback loops and chemical communication of stress to fluctuating heat stress in a vulnerable  
364 life stage of fish. This is important because such stress feedback loops may be widespread and have implications  
365 on tipping points of ecosystems facing ongoing and future global change. We suggest further investigation into  
366 the identification of the nature of metabolites contained within stress medium, their molecular consequences at an  
367 individual level, as well as longer-term consequences for populations and ecosystems.

368 **Acknowledgements**

369 The authors acknowledge Alan Smith and Sonia Jennings for providing fish care, Emma Chapman, Robert  
370 Donnelly for support in the laboratory, Adam Bates and Paulo Saldanha (University of Hull, UK) for support in  
371 discussing the experiments, and all members of the MolStressH2O research cluster (University of Hull, UK) for  
372 valuable discussions and peer review. For help with initial zebrafish method development we thank Antoinette  
373 Destefano, Amber Pinnock, Tiana Weeks, and Tia Rusciano (Bethune-Cookman University, USA) and Tyrese  
374 Taylor (Indiana University, USA). Funding was provided by the University of Hull to LF, VS, QRB, PBA and  
375 KWV and the Royal Society (RGS\R2\180033) to KWV.

376

377 **Conflicts of Interest**

378 The authors declare no conflicts of interest.

379

380 **Ethics approval**

381 All experiments were approved by the University of Hull Ethics committee under the approval U144b.

382

383 **Consent to participate**

384 All authors consented to participation.

385

386 **Consent for publication**

387 All authors consented to publication.

388

389 **Author contribution**

390 KWV conceived the study. KWV and PBA designed the experiments. LF, QRB, and VS collected the data and  
391 contributed to the statistical analysis. LF wrote the manuscript draft with PBA and KWV. All authors contributed  
392 to the final manuscript.

393

394 **References**

- 395 Abreu, M. S., Giacomini, A. C. V., Gusso, D., Koakoski, G., Oliveira, T. A., Marqueze, A., Barreto, R. E., &  
396 Barcellos, L. J. G. (2016). Behavioral responses of zebrafish depend on the type of threatening chemical  
397 cues. *Journal of Comparative Physiology A*, 202(12), 895–901. <https://doi.org/10.1007/s00359-016-1129-5>
- 398 Alsop, D., & Vijayan, M. M. (2009). Molecular programming of the corticosteroid stress axis during zebrafish  
399 development. *Comparative Biochemistry and Physiology Part A: Molecular & Integrative Physiology*,  
400 153(1), 49–54. <https://doi.org/10.1016/j.cbpa.2008.12.008>
- 401 Araújo, M. B., Ferri-Yáñez, F., Bozinovic, F., Marquet, P. A., Valladares, F., & Chown, S. L. (2013). Heat  
402 freezes niche evolution. *Ecology Letters*, 16(9), 1206–1219. <https://doi.org/10.1111/ele.12155>

- 403 Atherton, J. A., & McCormick, M. I. (2015). Active in the sac: damselfish embryos use innate recognition of  
404 odours to learn predation risk before hatching. *Animal Behaviour*, *103*, 1–6.  
405 <https://doi.org/10.1016/j.anbehav.2015.01.033>
- 406 Atherton, J. A., & McCormick, M. I. (2017). Kin recognition in embryonic damselfishes. *Oikos*, *126*(7), 1062–  
407 1069. <https://doi.org/10.1111/oik.03597>
- 408 Aubret, F., Blanvillain, G., Bignon, F., & Kok, P. J. R. (2016). Heartbeat, embryo communication and hatching  
409 synchrony in snake eggs. *Scientific Reports*, *6*, 23519. <https://doi.org/10.1038/srep23519>
- 410 Augustyn, K. D. C., Jackson, M. R., & Jorns, M. S. (2017). Use of Tissue Metabolite Analysis and Enzyme  
411 Kinetics To Discriminate between Alternate Pathways for Hydrogen Sulfide Metabolism. *Biochemistry*,  
412 *56*(7), 986–996. <https://doi.org/10.1021/acs.biochem.6b01093>
- 413 Bairos-Novak, K. R., Mitchell, M. D., Crane, A. L., Chivers, D. P., & Ferrari, M. C. O. (2017). Trust thy  
414 neighbour in times of trouble: background risk alters how tadpoles release and respond to disturbance cues.  
415 *Proceedings of the Royal Society B: Biological Sciences*, *284*(1863).  
416 <https://doi.org/10.1098/rspb.2017.1465>
- 417 Bai, Y., Liu, H., Huang, B., Wagle, M., & Guo, S. (2016). Identification of environmental stressors and  
418 validation of light preference as a measure of anxiety in larval zebrafish. *BMC Neuroscience*, *17*(1), 63.  
419 <https://doi.org/10.1186/s12868-016-0298-z>
- 420 Barcellos, L. J. G., Koakoski, G., da Rosa, J. G. S., Ferreira, D., Barreto, R. E., Giaquinto, P. C., & Volpato, G.  
421 L. (2014). Chemical communication of predation risk in zebrafish does not depend on cortisol increase.  
422 *Scientific Reports*, *4*, 5076. <https://doi.org/10.1038/srep05076>
- 423 Barcellos, L. J. G., Volpato, G. L., Barreto, R. E., Coldebella, I., & Ferreira, D. (2011). Chemical  
424 communication of handling stress in fish. *Physiology & Behavior*, *103*(3-4), 372–375.  
425 <https://doi.org/10.1016/j.physbeh.2011.03.009>
- 426 Barton, B. A., & Iwama, G. K. (1991). Physiological changes in fish from stress in aquaculture with emphasis on  
427 the response and effects of corticosteroids. *Annual Review of Fish Diseases*, *1*, 3–26.  
428 [https://doi.org/10.1016/0959-8030\(91\)90019-G](https://doi.org/10.1016/0959-8030(91)90019-G)
- 429 Bett, N. N., Hinch, S. G., & Yun, S.-S. (2016). Behavioural responses of Pacific salmon to chemical disturbance  
430 cues during the spawning migration. *Behavioural Processes*, *132*, 76–84.  
431 <https://doi.org/10.1016/j.beproc.2016.10.001>
- 432 Brett, J. R. (1971). Energetic Responses of Salmon to Temperature. A Study of Some Thermal Relations in the  
433 Physiology and Freshwater Ecology of Sockeye Salmon (*Oncorhynchus nerka*). *American Zoologist*, *11*(1),  
434 99–113. <https://doi.org/10.1093/icb/11.1.99>
- 435 Brown, A. R., Owen, S. F., Peters, J., Zhang, Y., Soffker, M., Paull, G. C., Hosken, D. J., Wahab, M. A., &  
436 Tyler, C. R. (2015). Climate change and pollution speed declines in zebrafish populations. *Proceedings of*  
437 *the National Academy of Sciences*, *112*(11), E1237–E1246. <https://doi.org/10.1073/pnas.1416269112>
- 438 Bucking, C., Lemoine, C. M. R., & Walsh, P. J. (2013). Waste nitrogen metabolism and excretion in zebrafish



- 439 embryos: effects of light, ammonia, and nicotinamide. *Journal of Experimental Zoology. Part A, Ecological*  
440 *Genetics and Physiology*, 319(7), 391–403. <https://doi.org/10.1002/jez.1802>
- 441 Cahill, C. M., Waterman, W. R., Xie, Y., Auron, P. E., & Calderwood, S. K. (1996). Transcriptional repression  
442 of the prointerleukin 1beta gene by heat shock factor 1. *Journal of Biological Chemistry*, 271(40), 24874–  
443 24879. <https://www.ncbi.nlm.nih.gov/pubmed/8926278>
- 444 Castillo, J., Teles, M., Mackenzie, S., & Tort, L. (2009). Stress-related hormones modulate cytokine expression  
445 in the head kidney of gilthead seabream (*Sparus aurata*). *Fish & Shellfish Immunology*, 27(3), 493–499.  
446 <https://doi.org/10.1016/j.fsi.2009.06.021>
- 447 Castro, R., Zou, J., Secombes, C. J., & Martin, S. A. M. (2011). Cortisol modulates the induction of  
448 inflammatory gene expression in a rainbow trout macrophage cell line. *Fish & Shellfish Immunology*, 30(1),  
449 215–223. <https://doi.org/10.1016/j.fsi.2010.10.010>
- 450 Chao, D., He, X., Yang, Y., Balboni, G., Salvadori, S., Kim, D. H., & Xia, Y. (2012). Hydrogen sulfide induced  
451 disruption of Na<sup>+</sup> homeostasis in the cortex. *Toxicological Sciences*, 128(1), 198–208.  
452 <https://doi.org/10.1093/toxsci/kfs125>
- 453 Cheng, C.-H., Guo, Z.-X., Luo, S.-W., & Wang, A.-L. (2018). Effects of high temperature on biochemical  
454 parameters, oxidative stress, DNA damage and apoptosis of pufferfish (*Takifugu obscurus*). *Ecotoxicology*  
455 *and Environmental Safety*, 150, 190–198. <https://doi.org/10.1016/j.ecoenv.2017.12.045>
- 456 Chivers, D. P., Dixson, D. L., White, J. R., McCormick, M. I., & Ferrari, M. C. O. (2013). Degradation of  
457 chemical alarm cues and assessment of risk throughout the day. *Ecology and Evolution*, 3(11), 3925–3934.  
458 <https://doi.org/10.1002/ece3.760>
- 459 Cingi, S., Keinänen, M., & Vuorinen, P. J. (2010). Elevated water temperature impairs fertilization and  
460 embryonic development of whitefish *Coregonus lavaretus*. *Journal of Fish Biology*, 76(3), 502–521.  
461 <https://doi.org/10.1111/j.1095-8649.2009.02502.x>
- 462 Clark, K. J., Boczek, N. J., & Ekker, S. C. (2011). Stressing zebrafish for behavioral genetics. *Reviews in the*  
463 *Neurosciences*, 22(1), 49–62. <https://doi.org/10.1515/RNS.2011.007>
- 464 Colbert, P. L., Spencer, R.-J., & Janzen, F. J. (2010). Mechanism and cost of synchronous hatching. *Functional*  
465 *Ecology*, 24(1), 112–121. <https://doi.org/10.1111/j.1365-2435.2009.01602.x>
- 466 Colinet, H., Sinclair, B. J., Vernon, P., & Renault, D. (2015). Insects in fluctuating thermal environments.  
467 *Annual Review of Entomology*, 60(1), 123–140. <https://doi.org/10.1146/annurev-ento-010814-021017>
- 468 Colson, V., Cousture, M., Damasceno, D., Valotaire, C., Nguyen, T., Le Cam, A., & Bobe, J. (2019). Maternal  
469 temperature exposure impairs emotional and cognitive responses and triggers dysregulation of  
470 neurodevelopment genes in fish. *PeerJ*, 7, e6338. <https://doi.org/10.7717/peerj.6338>
- 471 Dimitriadi, A., Beis, D., Arvanitidis, C., Adriaens, D., & Koumoundouros, G. (2018). Developmental  
472 temperature has persistent, sexually dimorphic effects on zebrafish cardiac anatomy. *Scientific Reports*,  
473 8(1), 8125. <https://doi.org/10.1038/s41598-018-25991-8>
- 474 Engeszer, R. E., Patterson, L. B., Rao, A. A., & Parichy, D. M. (2007). Zebrafish in the wild: a review of natural



- 475 history and new notes from the field. *Zebrafish*, 4(1), 21–40. <https://doi.org/10.1089/zeb.2006.9997>
- 476 Ferrari, M. C. O., Vavrek, M. A., Elvidge, C. K., & Fridman, B. (2008). Sensory complementation and the  
477 acquisition of predator recognition by salmonid fishes. *Behavioral Ecology and Sociobiology*, 63(1), 113–  
478 121.
- 479 Feugere, L., Angell, L., Fagents, J., Nightingale, R., Rowland, K., Skinner, S., Hardege, J. D., Bartels-Hardege,  
480 H. D., & Wollenberg Valero, K. C. Behavioural stress feedback loops in benthic invertebrates caused by pH  
481 drop-induced metabolites. *Manuscript Submitted for Publication*.
- 482 Gau, P., Poon, J., Ufret-Vincenty, C., Snelson, C. D., Gordon, S. E., Raible, D. W., & Dhaka, A. (2013). The  
483 zebrafish ortholog of TRPV1 is required for heat-induced locomotion. *Journal of Neuroscience*, 33(12),  
484 5249–5260. <https://doi.org/10.1523/JNEUROSCI.5403-12.2013>
- 485 Giacomini, A. C. V. V., de Abreu, M. S., Koakoski, G., Idalêncio, R., Kalichak, F., Oliveira, T. A., da Rosa, J.  
486 G. S., Gusso, D., Piato, A. L., & Barcellos, L. J. G. (2015). My stress, our stress: blunted cortisol response  
487 to stress in isolated housed zebrafish. *Physiology & Behavior*, 139, 182–187.  
488 <https://doi.org/10.1016/j.physbeh.2014.11.035>
- 489 Giaquinto, P. C., & Hoffmann, A. (2012). The scent of stress: Pintado catfish differentially respond to chemical  
490 cues from stressed conspecifics. *Behaviour*, 149(9), 941–951. <https://doi.org/10.1163/1568539X-00003022>
- 491 Goshen, I., & Yirmiya, R. (2009). Interleukin-1 (IL-1): a central regulator of stress responses. *Frontiers in*  
492 *Neuroendocrinology*, 30(1), 30–45. <https://doi.org/10.1016/j.yfrne.2008.10.001>
- 493 Guo, L., Wang, Y., Liang, S., Lin, G., Chen, S., & Yang, G. (2016). Tissue-overlapping response of half-smooth  
494 tongue sole (*Cynoglossus semilaevis*) to thermotransferring based on transcriptome profiles. *Gene*, 586(1), 97–  
495 104. <https://doi.org/10.1016/j.gene.2016.04.020>
- 496 Haesemeyer, M., Robson, D. N., Li, J. M., Schier, A. F., & Engert, F. (2015). The structure and timescales of  
497 heat perception in larval zebrafish. *Cell Systems*, 1(5), 338–348. <https://doi.org/10.1016/j.cels.2015.10.010>
- 498 Haesemeyer, M., Robson, D. N., Li, J. M., Schier, A. F., & Engert, F. (2018). A Brain-wide Circuit Model of  
499 Heat-Evoked Swimming Behavior in Larval Zebrafish. *Neuron*, 98(4), 817–831.e6.  
500 <https://doi.org/10.1016/j.neuron.2018.04.013>
- 501 Hallare, A. V., Schirling, M., Luckenbach, T., Köhler, H.-R., & Triebkorn, R. (2005). Combined effects of  
502 temperature and cadmium on developmental parameters and biomarker responses in zebrafish (*Danio rerio*)  
503 embryos. *Journal of Thermal Biology*, 30(1), 7–17. <https://doi.org/10.1016/j.jtherbio.2004.06.002>
- 504 Hall, J. M., & Warner, D. A. (2020a). Thermal sensitivity of lizard embryos indicates a mismatch between  
505 oxygen supply and demand at near-lethal temperatures. *Journal of Experimental Zoology*, 327, 466.  
506 <https://doi.org/10.1002/jez.2359>
- 507 Hall, J. M., & Warner, D. A. (2020b). Ecologically relevant thermal fluctuations enhance offspring fitness:  
508 biological and methodological implications for studies of thermal developmental plasticity. *Journal of*  
509 *Experimental Biology*, 223(Pt 19). <https://doi.org/10.1242/jeb.231902>
- 510 Hazlett, B. A. (1985). Disturbance pheromones in the crayfish *Orconectes virilis*. *Journal of Chemical Ecology*,

- 511 *11*(12), 1695–1711. <https://doi.org/10.1007/BF01012121>
- 512 Henderson, L. J., Ryan, M. R., & Rowland, H. M. (2017). Perch, *Perca fluviatilis* show a directional preference  
513 for, but do not increase attacks toward, prey in response to water-borne cortisol. *PeerJ*, *5*(10), e3883.  
514 <https://doi.org/10.7717/peerj.3883>
- 515 Horsman, J. W., & Miller, D. L. (2016). Mitochondrial Sulfide Quinone Oxidoreductase Prevents Activation of  
516 the Unfolded Protein Response in Hydrogen Sulfide. *Journal of Biological Chemistry*, *291*(10), 5320–5325.  
517 <https://doi.org/10.1074/jbc.M115.697102>
- 518 Hosseini, S., Brenig, B., Tetens, J., & Sharifi, A. R. (2019). Phenotypic plasticity induced using high ambient  
519 temperature during embryogenesis in domesticated zebrafish, *Danio rerio*. *Reproduction in Domestic*  
520 *Animals*, *54*(3), 435–444. <https://doi.org/10.1111/rda.13382>
- 521 Hubbard, P. C., Barata, E. N., & Canário, A. V. M. (2003). Olfactory sensitivity to catecholamines and their  
522 metabolites in the goldfish. *Chemical Senses*, *28*(3), 207–218. <https://doi.org/10.1093/chemse/28.3.207>
- 523 Icoğlu Aksakal, F., & Ciltas, A. (2018). The impact of ultraviolet B (UV-B) radiation in combination with  
524 different temperatures in the early life stage of zebrafish (*Danio rerio*). *Photochemical & Photobiological*  
525 *Sciences*, *17*(1), 35–41. <https://doi.org/10.1039/c7pp00236j>
- 526 Ihaka, R., & Gentleman, R. (1996). R: A Language for Data Analysis and Graphics. *Journal of Computational*  
527 *and Graphical Statistics*, *5*(3), 299–314. <https://doi.org/10.1080/10618600.1996.10474713>
- 528 Jackson, M. R., Melideo, S. L., & Jorns, M. S. (2012). Human sulfide:quinone oxidoreductase catalyzes the first  
529 step in hydrogen sulfide metabolism and produces a sulfane sulfur metabolite. *Biochemistry*, *51*(34), 6804–  
530 6815. <https://doi.org/10.1021/bi300778t>
- 531 Jordão, L. C., & Volpato, G. L. (2000). Chemical Transfer of Warning Information in Non-Injured Fish.  
532 *Behaviour*, *137*(6), 681–690. <http://www.jstor.org/stable/4535732>
- 533 Kimmel, C. B., Ballard, W. W., Kimmel, S. R., Ullmann, B., & Schilling, T. F. (1995). Stages of Embryonic  
534 Development of the Zebrafish. *Developmental Dynamics*, *203*(3), 253–310.
- 535 Kimura, Y., Goto, Y.-I., & Kimura, H. (2010). Hydrogen sulfide increases glutathione production and suppresses  
536 oxidative stress in mitochondria. *Antioxidants & Redox Signaling*, *12*(1), 1–13.  
537 <https://doi.org/10.1089/ars.2008.2282>
- 538 Kingsolver, J. G., Higgins, J. K., & Augustine, K. E. (2015). Fluctuating temperatures and ectotherm growth:  
539 distinguishing non-linear and time-dependent effects. *Journal of Experimental Biology*, *218*(Pt 14), 2218–  
540 2225. <https://doi.org/10.1242/jeb.120733>
- 541 Kirsten, K., Fior, D., Kreutz, L. C., & Barcellos, L. J. G. (2018). First description of behavior and immune  
542 system relationship in fish. *Scientific Reports*, *8*(1), 846. <https://doi.org/10.1038/s41598-018-19276-3>
- 543 Kleiner, G., Barca, E., Ziosi, M., Emmanuele, V., Xu, Y., Hidalgo-Gutierrez, A., Qiao, C., Tadesse, S., Area-  
544 Gomez, E., Lopez, L. C., & Quinzii, C. M. (2018). CoQ10 supplementation rescues nephrotic syndrome  
545 through normalization of H<sub>2</sub>S oxidation pathway. *Biochimica et Biophysica Acta, Molecular Basis of*  
546 *Disease*, *1864*(11), 3708–3722. <https://doi.org/10.1016/j.bbadis.2018.09.002>

- 547 Lenhard, W., & Lenhard, A. (2016). *Calculation of effect sizes*. Dettelbach (Germany): Psychometrica.  
548 <https://doi.org/10.13140/RG.2.2.17823.92329>
- 549 Lenth, R. (2019). emmeans: estimated marginal means, aka least-squares means. *R Package Version, 1*(1), 3.
- 550 Lienart, G. D. H., Ferrari, M. C. O., & McCormick, M. I. (2016). Thermal environment and nutritional condition  
551 affect the efficacy of chemical alarm cues produced by prey fish. *Environmental Biology of Fishes, 99*(10),  
552 729–739. <https://doi.org/10.1007/s10641-016-0516-7>
- 553 Lim, M. Y.-T., Manzon, R. G., Somers, C. M., Boreham, D. R., & Wilson, J. Y. (2017). The effects of  
554 fluctuating temperature regimes on the embryonic development of lake whitefish (*Coregonus*  
555 *clupeaformis*). *Comparative Biochemistry and Physiology. Part A, Molecular & Integrative Physiology,*  
556 *214*, 19–29. <https://doi.org/10.1016/j.cbpa.2017.08.010>
- 557 Liu, Z.-P., Gu, W.-B., Tu, D.-D., Zhu, Q.-H., Zhou, Y.-L., Wang, C., Wang, L.-Z., & Shu, M.-A. (2018). Effects  
558 of both cold and heat stress on the liver of the giant spiny frog (*Quasipaa spinosa*): stress response and  
559 histological changes. *Journal of Experimental Biology, 221*(Pt 21). <https://doi.org/10.1242/jeb.186379>
- 560 Logan, C. A., & Buckley, B. A. (2015). Transcriptomic responses to environmental temperature in eurythermal  
561 and stenothermal fishes. *Journal of Experimental Biology, 218*(Pt 12), 1915–1924.  
562 <https://doi.org/10.1242/jeb.114397>
- 563 Long, Y., Li, L., Li, Q., He, X., & Cui, Z. (2012). Transcriptomic characterization of temperature stress  
564 responses in larval zebrafish. *PLoS One, 7*(5), e37209. <https://doi.org/10.1371/journal.pone.0037209>
- 565 Long, Y., Yan, J., Song, G., Li, X., Li, X., Li, Q., & Cui, Z. (2015). Transcriptional events co-regulated by  
566 hypoxia and cold stresses in Zebrafish larvae. *BMC Genomics, 16*(1), 385. [https://doi.org/10.1186/s12864-](https://doi.org/10.1186/s12864-015-1560-y)  
567 [015-1560-y](https://doi.org/10.1186/s12864-015-1560-y)
- 568 López-Olmeda, J. F., & Sánchez-Vázquez, F. J. (2011). Thermal biology of zebrafish (*Danio rerio*). *Journal of*  
569 *Thermal Biology, 36*(2), 91–104. <https://doi.org/10.1016/j.jtherbio.2010.12.005>
- 570 Lucon-Xiccato, T., Di Mauro, G., Bisazza, A., & Bertolucci, C. (2020). Alarm cue-mediated response and  
571 learning in zebrafish larvae. *Behavioural Brain Research, 380*, 112446.  
572 <https://doi.org/10.1016/j.bbr.2019.112446>
- 573 Luna-Sánchez, M., Hidalgo-Gutiérrez, A., Hildebrandt, T. M., Chaves-Serrano, J., Barriocanal-Casado, E.,  
574 Santos-Fandila, Á., Romero, M., Sayed, R. K., Duarte, J., Prokisch, H., Schuelke, M., Distelmaier, F.,  
575 Escames, G., Acuña-Castroviejo, D., & López, L. C. (2017). CoQ deficiency causes disruption of  
576 mitochondrial sulfide oxidation, a new pathomechanism associated with this syndrome. *EMBO Molecular*  
577 *Medicine, 9*(1), 78–95. <https://doi.org/10.15252/emmm.201606345>
- 578 Luu, I., Ikert, H., & Craig, P. M. (2020). Chronic exposure to anthropogenic and climate related stressors alters  
579 transcriptional responses in the liver of zebrafish (*Danio rerio*) across multiple generations. *Comparative*  
580 *Biochemistry and Physiology. Part C, Pharmacology, Toxicology & Endocrinology, 240*, 108918.  
581 <https://doi.org/10.1016/j.cbpc.2020.108918>
- 582 Lyu, L., Wen, H., Li, Y., Li, J., Zhao, J., Zhang, S., Song, M., & Wang, X. (2018). Deep Transcriptomic

- 583 Analysis of Black Rockfish (*Sebastes schlegelii*) Provides New Insights on Responses to Acute  
584 Temperature Stress. *Scientific Reports*, 8(1), 9113. <https://doi.org/10.1038/s41598-018-27013-z>
- 585 Madeira, D., Costa, P. M., Vinagre, C., & Diniz, M. S. (2016). When warming hits harder: survival, cellular  
586 stress and thermal limits of *Sparus aurata* larvae under global change. *Marine Biology*, 163(4), 91.
- 587 Mahanty, A., Purohit, G. K., Banerjee, S., Karunakaran, D., Mohanty, S., & Mohanty, B. P. (2016). Proteomic  
588 changes in the liver of *Channa striatus* in response to high temperature stress. *Electrophoresis*, 37(12),  
589 1704–1717. <https://doi.org/10.1002/elps.201500393>
- 590 Mangiafico, S. (2018). rcompanion: Functions to support extension education program evaluation. *R Package*  
591 *Version*, 1(2).
- 592 Mariana, S., & Badr, G. (2019). Impact of heat stress on the immune response of fishes. *Journal of Survey in*  
593 *Fisheries Sciences*, 5(2), 149–159. <https://doi.org/10.18331/SFS2019.5.2.14>
- 594 Mathavan, S., Lee, S. G. P., Mak, A., Miller, L. D., Murthy, K. R. K., Govindarajan, K. R., Tong, Y., Wu, Y. L.,  
595 Lam, S. H., Yang, H., Ruan, Y., Korzh, V., Gong, Z., Liu, E. T., & Lufkin, T. (2005). Transcriptome  
596 analysis of zebrafish embryogenesis using microarrays. *PLoS Genetics*, 1(2), 260–276.  
597 <https://doi.org/10.1371/journal.pgen.0010029>
- 598 McGlashan, J. K., Spencer, R.-J., & Old, J. M. (2012). Embryonic communication in the nest: metabolic  
599 responses of reptilian embryos to developmental rates of siblings. *Proceedings of the Royal Society B:*  
600 *Biological Sciences*, 279(1734), 1709–1715. <https://doi.org/10.1098/rspb.2011.2074>
- 601 Metz, J. R., Huising, M. O., Leon, K., Verburg-van Kemenade, B. M. L., & Flik, G. (2006). Central and  
602 peripheral interleukin-1 $\beta$  and interleukin-1 receptor I expression and their role in the acute stress response  
603 of common carp, *Cyprinus carpio* L. *Journal of Endocrinology*, 191(1), 25–35.  
604 <https://joe.bioscientifica.com/view/journals/joe/191/1/1910025.xml>
- 605 Morgan, I. J., McDonald, D. G., & Wood, C. M. (2001). The cost of living for freshwater fish in a warmer, more  
606 polluted world. *Global Change Biology*, 7(4), 345–355.
- 607 Morgan, R., Sundin, J., Finnøen, M. H., Dresler, G., Vendrell, M. M., Dey, A., Sarkar, K., & Jutfelt, F. (2019).  
608 Are model organisms representative for climate change research? Testing thermal tolerance in wild and  
609 laboratory zebrafish populations. *Conservation Physiology*, 7(1), coz036.  
610 <https://doi.org/10.1093/conphys/coz036>
- 611 Oulton, L. J., Haviland, V., & Brown, C. (2013). Predator Recognition in Rainbowfish, *Melanotaenia duboulayi*,  
612 Embryos. *PLoS One*, 8(10), e76061. <https://doi.org/10.1371/journal.pone.0076061>
- 613 Paaajmans, K. P., Heinig, R. L., Seliga, R. A., Blanford, J. I., Blanford, S., Murdock, C. C., & Thomas, M. B.  
614 (2013). Temperature variation makes ectotherms more sensitive to climate change. *Global Change Biology*,  
615 19(8), 2373–2380. <https://doi.org/10.1111/gcb.12240>
- 616 Peterson, R. A., & Cavanaugh, J. E. (2020). Ordered quantile normalization: a semiparametric transformation  
617 built for the cross-validation era. *Journal of Applied Statistics*, 47(13-15), 2312–2327.  
618 <https://doi.org/10.1080/02664763.2019.1630372>

- 619 Poisson, A., Valotaire, C., Borel, F., Bertin, A., Darmaillacq, A.-S., Dickel, L., & Colson, V. (2017). Embryonic  
620 exposure to a conspecific alarm cue triggers behavioural plasticity in juvenile rainbow trout. *Animal*  
621 *Behaviour*, *133*, 35–45. <https://doi.org/10.1016/j.anbehav.2017.09.013>
- 622 Pörtner, H. O., & Peck, M. A. (2010). Climate change effects on fishes and fisheries: towards a cause-and-effect  
623 understanding. *Journal of Fish Biology*, *77*(8), 1745–1779. [https://doi.org/10.1111/j.1095-](https://doi.org/10.1111/j.1095-8649.2010.02783.x)  
624 [8649.2010.02783.x](https://doi.org/10.1111/j.1095-8649.2010.02783.x)
- 625 Pörtner, H. O., Roberts, D. C., Masson-Delmotte, V., Zhai, P., Tignor, M., Poloczanska, E., Mintenbeck, K.,  
626 Nicolai, M., Okem, A., Petzold, J., & Others. (2019). IPCC, 2019: Summary for Policymakers. *IPCC*  
627 *Special Report on the Ocean and Cryosphere in a Changing Climate*.
- 628 Pype, C., Verbueken, E., Saad, M. A., Casteleyn, C. R., Van Ginneken, C. J., Knapen, D., & Van Cruchten, S. J.  
629 (2015). Incubation at 32.5°C and above causes malformations in the zebrafish embryo. *Reproductive*  
630 *Toxicology*, *56*, 56–63. <https://doi.org/10.1016/j.reprotox.2015.05.006>
- 631 Quinzii, C. M., Luna-Sanchez, M., Ziosi, M., Hidalgo-Gutierrez, A., Kleiner, G., & Lopez, L. C. (2017). The  
632 Role of Sulfide Oxidation Impairment in the Pathogenesis of Primary CoQ Deficiency. *Frontiers in*  
633 *Physiology*, *8*, 525. <https://doi.org/10.3389/fphys.2017.00525>
- 634 Ribas, L., Liew, W. C., Díaz, N., Sreenivasan, R., Orbán, L., & Piferrer, F. (2017). Heat-induced masculinization  
635 in domesticated zebrafish is family-specific and yields a set of different gonadal transcriptomes.  
636 *Proceedings of the National Academy of Sciences*, *114*(6), E941–E950.  
637 <https://doi.org/10.1073/pnas.1609411114>
- 638 Ritchie, M. E., Phipson, B., Wu, D., Hu, Y., Law, C. W., Shi, W., & Smyth, G. K. (2015). limma powers  
639 differential expression analyses for RNA-sequencing and microarray studies. *Nucleic Acids Research*,  
640 *43*(7), e47. <https://doi.org/10.1093/nar/gkv007>
- 641 Roggatz, C. C., Fletcher, N., Benoit, D. M., Algar, A. C., Doroff, A., Wright, B., Wollenberg Valero, K. C., &  
642 Hardege, J. D. (2019). Saxitoxin and tetrodotoxin bioavailability increases in future oceans. *Nature Climate*  
643 *Change*, *9*(11), 840–844. <https://doi.org/10.1038/s41558-019-0589-3>
- 644 Rose, P., Moore, P. K., & Zhu, Y. Z. (2017). H<sub>2</sub>S biosynthesis and catabolism: new insights from molecular  
645 studies. In *Cellular and Molecular Life Sciences* (Vol. 74, Issue 8, pp. 1391–1412).  
646 <https://doi.org/10.1007/s00018-016-2406-8>
- 647 RStudio Team. (2020). *RStudio: Integrated Development Environment for R*. RStudio, PBC.  
648 <http://www.rstudio.com/>
- 649 Sawilowsky, S. S. (2009). New Effect Size Rules of Thumb. *Journal of Modern Applied Statistical Methods:*  
650 *JMASM*, *8*(2), 26. <https://doi.org/10.22237/jmasm/1257035100>
- 651 Saxon, A. D., O'Brien, E. K., & Bridle, J. R. (2018). Temperature fluctuations during development reduce male  
652 fitness and may limit adaptive potential in tropical rainforest *Drosophila*. *Journal of Evolutionary Biology*,  
653 *31*(3), 405–415. <https://doi.org/10.1111/jeb.13231>
- 654 Schaefer, J., & Ryan, A. (2006). Developmental plasticity in the thermal tolerance of zebrafish *Danio rerio*.



- 655 *Journal of Fish Biology*, 69(3), 722–734. <https://doi.org/10.1111/j.1095-8649.2006.01145.x>
- 656 Schirone, R. C., & Gross, L. (1968). Effect of temperature on early embryological development of the zebra fish,  
657 *Brachydanio rerio*. *Journal of Experimental Zoology*, 169(1), 43–52.  
658 <https://doi.org/10.1002/jez.1401690106>
- 659 Schmidt, K., & Starck, J. M. (2010). Developmental plasticity, modularity, and heterochrony during the  
660 phylotypic stage of the zebra fish, *Danio rerio*. *Journal of Experimental Zoology. Part B, Molecular and*  
661 *Developmental Evolution*, 314(2), 166–178. <https://doi.org/10.1002/jez.b.21320>
- 662 Schnurr, M. E., Yin, Y., & Scott, G. R. (2014). Temperature during embryonic development has persistent  
663 effects on metabolic enzymes in the muscle of zebrafish. *Journal of Experimental Biology*, 217(Pt 8), 1370–  
664 1380. <https://doi.org/10.1242/jeb.094037>
- 665 Schröter, C., Herrgen, L., Cardona, A., Brouhard, G. J., Feldman, B., & Oates, A. C. (2008). Dynamics of  
666 zebrafish somitogenesis. *Developmental Dynamics: An Official Publication of the American Association of*  
667 *Anatomists*, 237(3), 545–553. <https://doi.org/10.1002/dvdy.21458>
- 668 Scott, G. R., & Johnston, I. A. (2012). Temperature during embryonic development has persistent effects on  
669 thermal acclimation capacity in zebrafish. *Proceedings of the National Academy of Sciences*, 109(35),  
670 14247–14252. <https://doi.org/10.1073/pnas.1205012109>
- 671 Simčič, T., Jesenšek, D., & Brancelj, A. (2015). Effects of increased temperature on metabolic activity and  
672 oxidative stress in the first life stages of marble trout (*Salmo marmoratus*). *Fish Physiology and*  
673 *Biochemistry*, 41(4), 1005–1014. <https://doi.org/10.1007/s10695-015-0065-6>
- 674 Skjærven, K. H., Hamre, K., Penglase, S., Finn, R. N., & Olsvik, P. A. (2014). Thermal stress alters expression  
675 of genes involved in one carbon and DNA methylation pathways in Atlantic cod embryos. *Comparative*  
676 *Biochemistry and Physiology. Part A, Molecular & Integrative Physiology*, 173C, 17–27.  
677 <https://doi.org/10.1016/j.cbpa.2014.03.003>
- 678 Somero, G. N. (2010). The physiology of climate change: how potentials for acclimatization and genetic  
679 adaptation will determine “winners” and “losers.” *Journal of Experimental Biology*, 213(6), 912–920.  
680 <https://doi.org/10.1242/jeb.037473>
- 681 Spence, R., Gerlach, G., Lawrence, C., & Smith, C. (2008). The behaviour and ecology of the zebrafish, *Danio*  
682 *rerio*. *Biological Reviews of the Cambridge Philosophical Society*, 83(1), 13–34.  
683 <https://doi.org/10.1111/j.1469-185X.2007.00030.x>
- 684 Strecker, R., Seiler, T.-B., Hollert, H., & Braunbeck, T. (2011). Oxygen requirements of zebrafish (*Danio rerio*)  
685 embryos in embryo toxicity tests with environmental samples. *Comparative Biochemistry and Physiology.*  
686 *Toxicology & Pharmacology: CBP*, 153(3), 318–327. <https://doi.org/10.1016/j.cbpc.2010.12.002>
- 687 Toa, D. G., Afonso, L. O. B., & Iwama, G. K. (2004). Stress response of juvenile rainbow trout (*Oncorhynchus*  
688 *mykiss*) to chemical cues released from stressed conspecifics. *Fish Physiology and Biochemistry*, 30(2),  
689 103–108. <https://doi.org/10.1007/s10695-005-0266-5>
- 690 Torchiano, M. (2016). effsize: efficient effect size computation. *R Package*.



- 691 Vasseur, D. A., DeLong, J. P., Gilbert, B., Greig, H. S., Harley, C. D. G., McCann, K. S., Savage, V., Tunney, T.  
692 D., & O'Connor, M. I. (2014). Increased temperature variation poses a greater risk to species than climate  
693 warming. *Proceedings of the Royal Society B: Biological Sciences*, *281*(1779), 20132612.  
694 <https://doi.org/10.1098/rspb.2013.2612>
- 695 Villamizar, N., Ribas, L., Piferrer, F., Vera, L. M., & Sánchez-Vázquez, F. J. (2012). Impact of daily  
696 thermocycles on hatching rhythms, larval performance and sex differentiation of zebrafish. *PLoS One*,  
697 *7*(12), e52153. <https://doi.org/10.1371/journal.pone.0052153>
- 698 Villamizar, N., Vera, L. M., Foulkes, N. S., & Sánchez-Vázquez, F. J. (2014). Effect of lighting conditions on  
699 zebrafish growth and development. *Zebrafish*, *11*(2), 173–181. <https://doi.org/10.1089/zeb.2013.0926>
- 700 Vinagre, C., Madeira, D., Narciso, L., Cabral, H. N., & Diniz, M. (2012). Effect of temperature on oxidative  
701 stress in fish: Lipid peroxidation and catalase activity in the muscle of juvenile seabass, *Dicentrarchus*  
702 *labrax*. *Ecological Indicators*, *23*, 274–279. <https://doi.org/10.1016/j.ecolind.2012.04.009>
- 703 Vitkovic, L., Bockaert, J., & Jacque, C. (2000). “Inflammatory” cytokines: neuromodulators in normal brain?  
704 *Journal of Neurochemistry*, *74*(2), 457–471. <https://doi.org/10.1046/j.1471-4159.2000.740457.x>
- 705 Wang, Y., Liu, Z., Li, Z., Shi, H., Kang, Y., Wang, J., Huang, J., & Jiang, L. (2016). Effects of heat stress on  
706 respiratory burst, oxidative damage and SERPINH1 (HSP47) mRNA expression in rainbow trout  
707 *Oncorhynchus mykiss*. *Fish Physiology and Biochemistry*, *42*(2), 701–710. [https://doi.org/10.1007/s10695-](https://doi.org/10.1007/s10695-015-0170-6)  
708 [015-0170-6](https://doi.org/10.1007/s10695-015-0170-6)
- 709 Whitehouse, L. M., McDougall, C. S., Stefanovic, D. I., Boreham, D. R., Somers, C. M., Wilson, J. Y., &  
710 Manzon, R. G. (2017). Development of the embryonic heat shock response and the impact of repeated  
711 thermal stress in early stage lake whitefish (*Coregonus clupeaformis*) embryos. *Journal of Thermal Biology*,  
712 *69*, 294–301. <https://doi.org/10.1016/j.jtherbio.2017.08.013>
- 713 Wollenberg Valero, K. C., Garcia-Porta, J., Irisarri, I., Feugere, L., Bates, A., Kirchhof, S., Glavaš, O. J., Pafilis,  
714 P., Samuel, S. F., Müller, J., Vences, M., Turner, A. P., Beltran-Alvarez, P., & Storey, K. B. (2019). Abiotic  
715 environmental adaptation in vertebrates is characterized by functional genomic constraint. In *bioRxiv* (p.  
716 726240). <https://doi.org/10.1101/726240>
- 717 Xia, J. H., Li, H. L., Li, B. J., Gu, X. H., & Lin, H. R. (2018). Acute hypoxia stress induced abundant differential  
718 expression genes and alternative splicing events in heart of tilapia. *Gene*, *639*, 52–61.  
719 <https://doi.org/10.1016/j.gene.2017.10.002>
- 720 Xia, J., Peng, M., Huang, Y., & Elvidge, C. K. (2020). Acute warming in winter eliminates chemical alarm  
721 responses in threatened Qinling lenok *Brachymystax lenok tsinlingensis*. *Science of the Total Environment*,  
722 142807. <https://doi.org/10.1016/j.scitotenv.2020.142807>
- 723 Yokogawa, T., Iadarola, M., & Burgess, H. (2014). Thermal response behaviors in larval zebrafish: startle  
724 escape, thermotaxis and thermal arousal. *Measuring Behavior 2014*.
- 725 Yonezawa, D., Sekiguchi, F., Miyamoto, M., Taniguchi, E., Honjo, M., Masuko, T., Nishikawa, H., &  
726 Kawabata, A. (2007). A protective role of hydrogen sulfide against oxidative stress in rat gastric mucosal

- 727 epithelium. *Toxicology*, *241*(1-2), 11–18. <https://doi.org/10.1016/j.tox.2007.07.020>
- 728 Zahangir, M. M., Haque, F., Mustakim, G. M., Khatun, H., & Islam, M. S. (2015). Effect of water pH on the  
729 early developmental responses in zebrafish (*danio rerio*). *Progressive Agriculture*, *26*(1), 85–89.  
730 <https://doi.org/10.3329/pa.v26i1.24521>
- 731 Zhang, Q., Kopp, M., Babiak, I., & Fernandes, J. M. O. (2018). Low incubation temperature during early  
732 development negatively affects survival and related innate immune processes in zebrafish larvae exposed to  
733 lipopolysaccharide. *Scientific Reports*, *8*(1), 4142. <https://doi.org/10.1038/s41598-018-22288-8>
- 734 Zhuang, Z., Xu, L., Yang, J., Gao, H., Zhang, L., Gao, X., Li, J., & Zhu, B. (2020). Weighted Single-Step  
735 Genome-Wide Association Study for Growth Traits in Chinese Simmental Beef Cattle. *Genes*, *11*(2).  
736 <https://doi.org/10.3390/genes11020189>
- 737 Ziosi, M., Di Meo, I., Kleiner, G., Gao, X.-H., Barca, E., Sanchez-Quintero, M. J., Tadesse, S., Jiang, H., Qiao,  
738 C., Rodenburg, R. J., Scalais, E., Schuelke, M., Willard, B., Hatzoglou, M., Tiranti, V., & Quinzii, C. M.  
739 (2017). Coenzyme Q deficiency causes impairment of the sulfide oxidation pathway. *EMBO Molecular*  
740 *Medicine*, *9*(1), 96–111. <https://doi.org/10.15252/emmm.201606356>

741 **Tables**

742 **Table 1. Effects of thermal stress and stress medium on the growth index of pre-hatching zebrafish embryos.**

743 A two-way ANOVA was used to test the effects of the predictors (thermal stress and stress medium) on changes  
744 in growth index. Effect size is computed as Cohen's  $|d|$  and interpreted according to thresholds given in  
745 Sawilowsky (Sawilowsky, 2009). Effect sizes of significant p-values ( $P \leq 0.05$ ) are shown in bold.

746

| <b>Model terms</b>             | <b>F statistic</b> | <b>P</b> | <b> d </b> | <b>Effect size</b> |
|--------------------------------|--------------------|----------|------------|--------------------|
| Stress Medium                  | 6.291              | 0.0128   | 0.29       | small              |
| Thermal Stress                 | 75.502             | 0.0001   | 1.14       | large              |
| Thermal Stress x Stress Medium | 7.498              | 0.0067   | 1.27       | very large         |

747

748 **Table 2. Effects of thermal stress and stress medium on the burst activity percentage of pre-hatching**  
749 **zebrafish embryos.** A two-way Scheirer-Ray-Hare test was used to test the effects of the predictors (thermal stress  
750 and stress medium) on burst activity percentages across treatments. Effect size is computed as Cohen's |d| and  
751 interpreted according to thresholds given in Sawilowsky (Sawilowsky 2009). Effect sizes of significant p-values  
752 ( $P \leq 0.05$ ) are shown in bold.

753

| <b>Model terms</b>             | <b>H statistic</b> | <b>P</b> | <b> d </b> | <b>Effect size</b> |
|--------------------------------|--------------------|----------|------------|--------------------|
| Stress Medium                  | 9.3222             | 0.0023   | 0.49       | small              |
| Thermal Stress                 | 17.0080            | 0.0001   | 0.55       | medium             |
| Thermal Stress x Stress Medium | 1.8193             | 0.1774   | 0.99       | large              |

754

755 **Table 3. Effect of thermal stress and stress medium on gene expression of pre-hatching zebrafish embryos.**  
756 Effects of model terms (thermal stress and stress medium) on the expression of IL-1 $\beta$ , SOD1 and SQOR obtained  
757 via moderated t-tests (t-statistic) with *lmer* and *eBayes* in the *limma* R package. B describes the log-odds of gene  
758 expression. Effect size is computed as Cohen's |d| and interpreted according to thresholds given in Sawilowsky  
759 (Sawilowsky 2009). Effect sizes of significant p-values ( $P \leq 0.05$ ) are shown in bold.

760

| <b>Model terms</b>            | <b>t</b> | <b>B</b> | <b>P</b> | <b> d </b> | <b>Effect size</b> |
|-------------------------------|----------|----------|----------|------------|--------------------|
| <b>IL-1<math>\beta</math></b> |          |          |          |            |                    |
| Thermal Stress                | 1.03     | -4.70    | 0.310    | 0.49       | medium             |
| Stress Medium                 | 2.28     | -3.95    | 0.038    | 1.2        | very large         |
| <b>SOD1</b>                   |          |          |          |            |                    |
| Thermal Stress                | 1.65     | -4.27    | 0.108    | 1.08       | large              |
| Stress Medium                 | 0.32     | -6.16    | 0.757    | 0.17       | small              |
| <b>SQOR</b>                   |          |          |          |            |                    |
| Thermal Stress                | -0.17    | -4.99    | 0.869    | 0.11       | small              |
| Stress Medium                 | -3.54    | -1.67    | 0.003    | 2.43       | huge               |

761

762 **Figures**

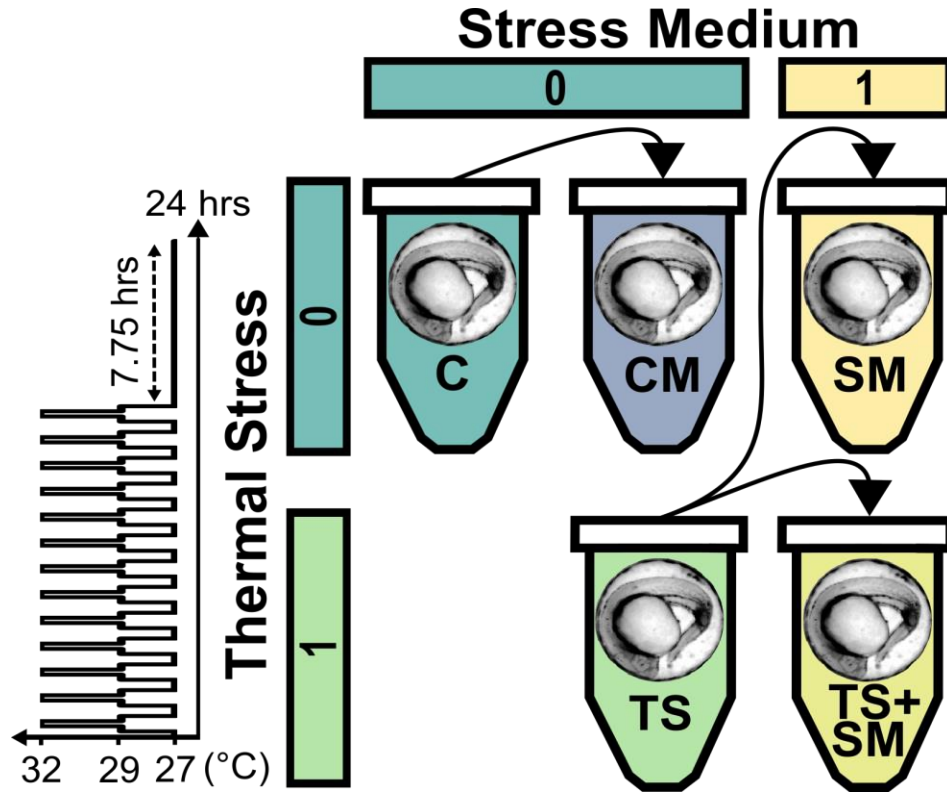

763

764

765 **Figure 1. Overview of experimental design.** In a two-way factorial design (represented by 0 and 1 for factor  
766 levels, respectively), zebrafish embryos (*Danio rerio*) were exposed to either fluctuating thermal stress (inset  
767 diagram) followed by a recovery period (dashed arrow line) or constant control temperature (27°C), in combination  
768 with fresh E3 medium or stress medium containing putative stress metabolites produced by one previously  
769 thermally-stressed embryo. An additional treatment was incubated at 27°C in a control medium containing  
770 metabolites from an embryo previously exposed to control conditions. Plain black arrows indicate medium transfer  
771 in which a new embryo was incubated. CM: control medium, C: control, SM: stress medium, TS: thermal stress,  
772 TS+SM: thermal stress + stress medium.



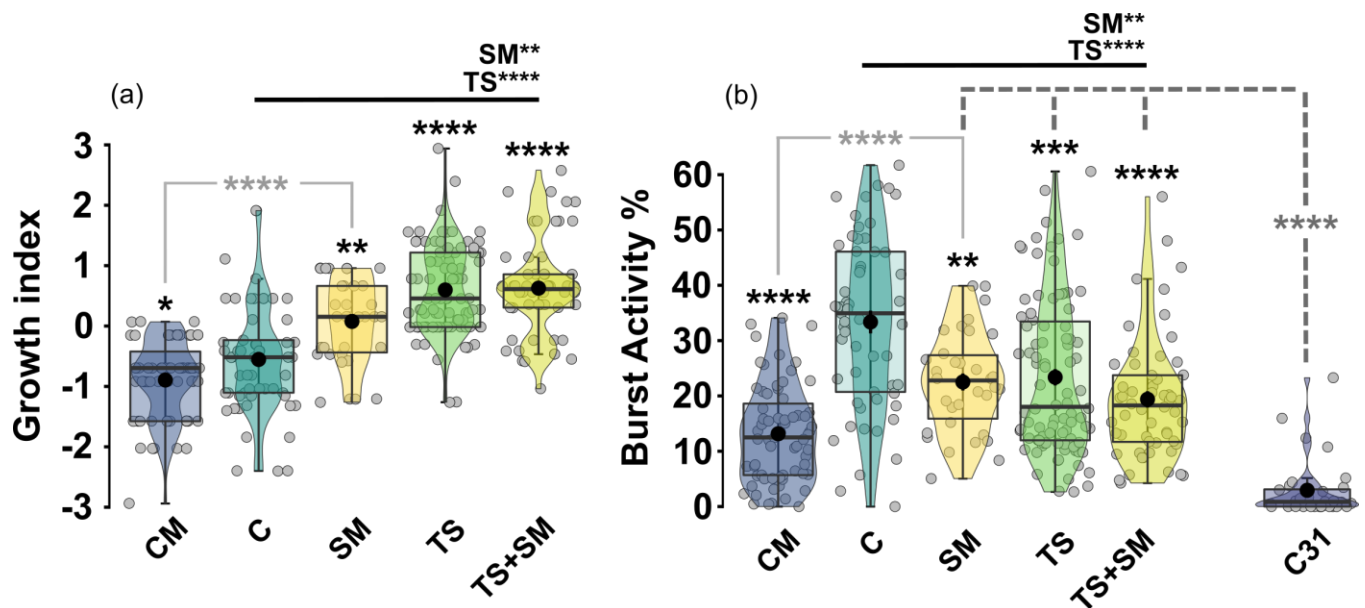

773

774

775

776

777

778

779

780

781

782

783

784

**Figure 2. Thermal stress and stress medium accelerate the growth index (a) and lower the burst activity percentage (b) of pre-hatching zebrafish embryos.** CM: control medium ( $n = 67$ ), C: control ( $n = 57$ ), SM: stress medium ( $n = 34$ ), TS: thermal stress ( $n = 90$ ), TS+SM: thermal stress + stress medium ( $n = 56$ ), C31: control after 31 hrs of incubation (reaching prim-6 stage). Boxes represent median, 25%-75% quartiles, and whiskers are minimum and maximum values within 1.5 IQR (interquartile range). Grey dots represent individual data points and black dots represent mean values. Effects of predictors (thermal stress and stress medium) were tested with two-factorial tests. Significant predictors are indicated in bold above horizontal black lines with \*:  $P \leq 0.05$ , \*\*:  $P \leq 0.01$ , \*\*\*:  $P \leq 0.001$ , \*\*\*\*:  $P \leq 0.0001$ . Significance of pairwise post-hoc tests is likewise indicated in asterisks, for treatments against C (bold black), between SM and CM (light grey), or between over-developing treatments (SM, TS, TS+SM) and C31 (dashed bar with dark grey asterisk).

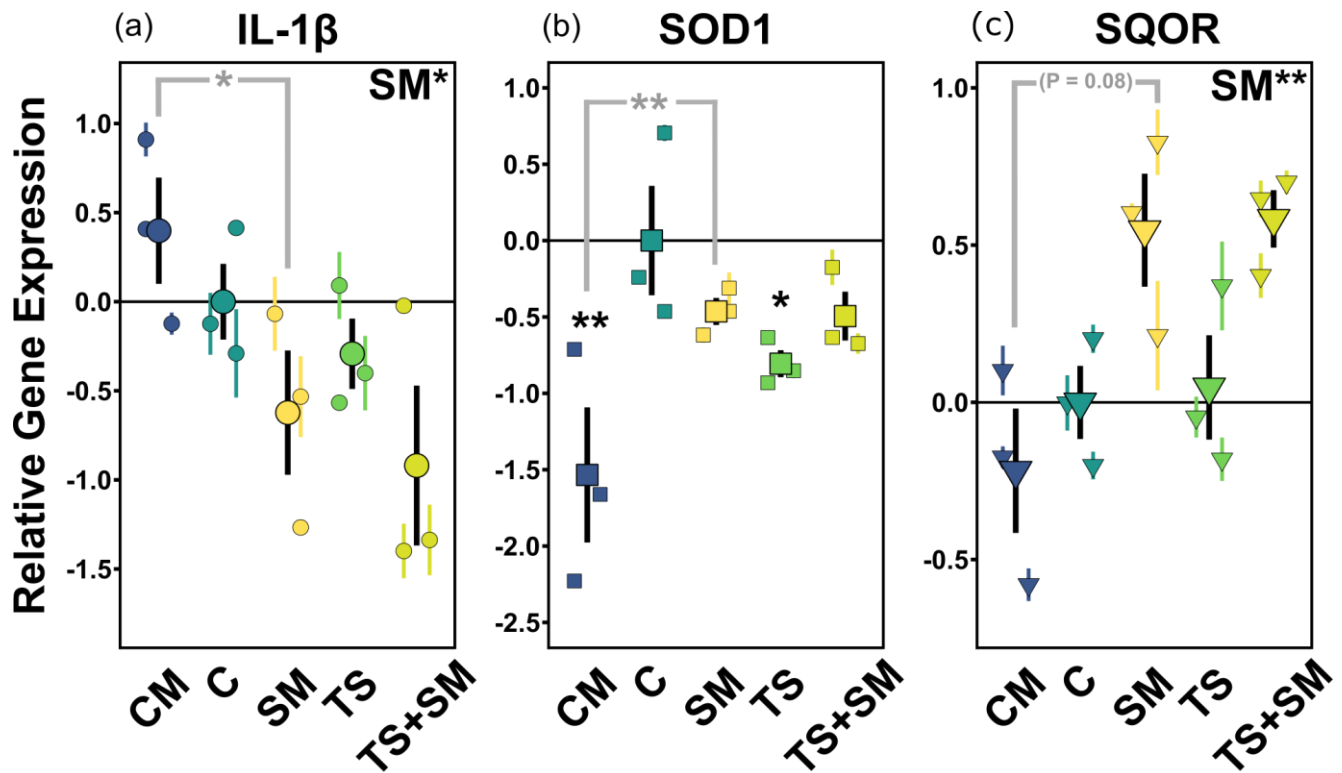

785

786

787

788

789

790

791

792

793

794

795

796

797

798

**Figure 3. Stress medium alters stress-related gene expression of zebrafish embryos.** (a) IL-1 $\beta$  (interleukin-1 $\beta$ ), involved in immune response. (b) SOD1 (superoxide dismutase 1), involved in antioxidant response. (c) SQOR (sulfide:quinone oxidoreductase), involved in metabolism and antioxidant response. Jittered symbols represent mean  $\text{Log}_2 2^{-\Delta\Delta\text{CT}} \pm \text{SE}$  (coloured bars) values of each biological replicate. Black symbols represent mean  $\text{Log}_2 2^{-\Delta\Delta\text{CT}} \pm \text{SE}$  (black bars) values of each biological treatment. Expression is relative to control C (mean values as black horizontal lines). CM: control medium, C: control, SM: stress medium, TS: thermal stress, TS+SM: thermal stress + stress medium. Annotations on top right corners represent the factorial effects of thermal stress (TS) and stress medium (SM) on C, SM, TS, TS+SM. Black asterisks above each mean value only show the pairwise comparisons against the control C. Comparisons between CM and SM are represented in grey by asterisks and dashed horizontal lines. Statistics were computed using moderated t-tests (Limma, Bioconductor, R) with Bonferroni adjustment with \*:  $P \leq 0.05$ , \*\*:  $P \leq 0.01$ . Sample size:  $n = 3$  biological replicates for each treatment, with 60 pooled embryos per each replicate.
